# Supplementary material for: Enwrapping ZnIn2S4 on vacancy-rich Nb2O5 nanoplates for enhanced photocatalytic hydrogen evolution
Source: Royal Society of Chemistry journal article supplement (doi:10.1039/d3qi02049e), 2023-12-07
Supplement: d3qi02049e1.pdf [file d3qi02049e1.pdf]

## Supporting Information

### **Enwrapping ZnIn<sub>2</sub>S<sub>4</sub> on vacancy-rich Nb<sub>2</sub>O<sub>5</sub> nanoplate for enhanced photocatalytic hydrogen evolution**

*Yong-Qi Liu<sup>a,§</sup>, Wen-Jing Yi<sup>a,c,§</sup>, Chuan-Qi Li<sup>b,c,\*</sup>, Xin Du<sup>c</sup>, Zhong-Yi Liu<sup>a,c</sup>, and Xin-Zheng Yue<sup>c,\*</sup>*

5 <sup>a</sup>School of Chemical Engineering, Zhengzhou University, Zhengzhou 450001, China.

<sup>b</sup>School of Chemistry and Chemical Engineering, Henan University of Technology, Zhengzhou 450001, China.

<sup>c</sup>College of Chemistry, Zhengzhou University, Zhengzhou 450001, China.

<sup>§</sup>Yong-Qi Liu and Wen-Jing Yi contributed equally to this work.

10 <sup>\*</sup>Corresponding authors: lichuanqi@haut.edu.cn; yuexz@zzu.edu.cn

## 1. Experimental section

### 1.1. Chemicals and materials

Melamine ( $C_3H_6N_6$ , 99%), ammonium niobate (V) oxalate hydrate ( $C_4H_4NNbO_9 \cdot nH_2O$ ,  $\geq 99.9\%$ ), sodium sulfite ( $Na_2SO_3$ , 98%), indium chloride tetrahydrate ( $InCl_3 \cdot 4H_2O$ , 99.9%), zinc chloride  
5 ( $ZnCl_2$ ,  $\geq 98\%$ ), thioacetamide (TAA,  $\geq 99\%$ ), and Nafion solution (5 wt%) were purchased from Aladdin. Ethanol ( $CH_3CH_2OH$ ,  $\geq 95.0\%$ ) and triethanolamine (TEOA, 98%) were bought from Shanghai Chemical Reagent Co., Ltd. Fluorine-doped tin oxide (F:SnO<sub>2</sub>, FTO,  $< 15 \text{ ohm sq}^{-1}$ ) glass was purchased from Zhuhai Kaivo Optoelectronic Technology Co., Ltd. N<sub>2</sub>/H<sub>2</sub> (20 vol% of H<sub>2</sub>) gas was purchased from Henan Yuanzheng Special Gas Co., Ltd. Deionized (DI) water (18.2 MΩ·cm) was  
10 prepared in the laboratory by instrument SZ-93A automatic pure water distiller (Shanghai Yarong biochemistry instrument factory).

### 1.2. Preparation of 2D Nb<sub>2</sub>O<sub>5</sub> and v-NO nanoplates

In a typical experiment, 2.0 g of  $C_4H_4NNbO_9 \cdot nH_2O$  and 2.0 g of melamine were added to a beaker containing 15 mL of ethanol. After overnight stirring, the mixture was dried in a vacuum oven at 60°C.  
15 The mixture was then calcined at 550°C for 4 h with a heating rate of 2°C min<sup>-1</sup> in a muffle furnace. The powder of Nb<sub>2</sub>O<sub>5</sub> was then obtained (Fig. S1). For achieving vacancy-rich Nb<sub>2</sub>O<sub>5</sub> (denoted as v-NO), the initially prepared Nb<sub>2</sub>O<sub>5</sub> (0.2 g) was calcined in a tube furnace under an N<sub>2</sub>/H<sub>2</sub> atmosphere at 600°C for 3 h with a heating rate of 2°C min<sup>-1</sup>. Note that Nb<sub>2</sub>O<sub>5</sub> and v-NO exhibit white and grey colors (Fig. S1), respectively.

### 20 1.3. Preparation of ZIS/v-NO and ZIS

ZnIn<sub>2</sub>S<sub>4</sub>/v-NO (ZIS/v-NO) was fabricated via a hydrothermal reaction. Specifically, when preparing ZIS/v-NO-30 (the mass fraction of v-NO is 30%), 0.100 g of v-NO, 0.540 g of InCl<sub>3</sub>·4H<sub>2</sub>O, 0.272 g of ZnCl<sub>2</sub>, and 0.300 g of thioacetamide were dissolved into 80 mL of HCl aqueous solution (pH = 2.5) with continuous stirring. Then, 20 mL of glycerol was added to the mixture and reacted at 80°C for 3 h. Following centrifugation and ethanol washing, the target product was collected. Additionally, the ZIS/v-NO-*x* (*x* = 10, 30, 50, and 90 wt%) were prepared by altering the quantities of v-NO to be 0.014, 0.043, 0.071, and 0.129 g, respectively, where *x* represents the mass fraction of v-NO. The ZIS/v-NO-30 sample in this study was labeled as ZIS/v-NO unless otherwise specified. For comparison, pristine ZnIn<sub>2</sub>S<sub>4</sub> (ZIS) was also synthesized using a similar procedure without the addition of v-NO.

#### 1.4. Characterization

The morphologies of photocatalysts were characterized using focused ion beam scanning electron microscopy (FIB-SEM, Zeiss auriga-bu, German) and transmission electron microscopy (TEM, FEI TalosF200S, Czech). The crystalline structure of samples was characterized by powder X-ray diffraction (XRD) with a Malvern Panalytical Empyrean (Netherlands) instrument using Cu K $\alpha$  radiation ( $\lambda = 1.54056 \text{ \AA}$ ) at 45 kV and 40 mA in the  $2\theta$  range of 5-90° at a scanning rate of 8° min<sup>-1</sup>. Electron paramagnetic resonance (EPR) spectra were performed with an EPR spectrometer (EMX-9.5/12, German) at 298 K. X-ray photoelectron spectroscopy (XPS) measurements were carried out in a SPECS UHV system (German) equipped with a SPECS PHOIBOS 150 analyzer, a SPECS XR50 X-ray source and a SPECS 1D DLD detector using Al K $\alpha$  excitation. C 1s of 284.8 eV was used to calibrate all XPS spectra. The UV-vis diffuse reflectance spectra (UV-vis DRS) were measured on a

UV-vis-NIR spectrophotometer (Shimadzu UV-3600) detecting absorption over the range of 200-800 nm. The steady-state photoluminescence (PL) emission spectra with an excitation wavelength of 320 nm were measured on a spectrofluorometer (FluoroMax-4, HORIBA, France). The specific surface areas and pore-size distribution were performed by the Brunauer-Enmet-Teller (BET) method on the basis of N<sub>2</sub> adsorption-desorption isotherms recorded on an instrument (JW-BK112, China) at a liquid nitrogen temperature (−196°C).

### *1.5. Photocatalytic H<sub>2</sub> generation*

The photocatalytic H<sub>2</sub> generation experiments were tested with an all-glass automatic on-line trace gas analysis system (Labsolar-6A, Beijing Perfect Light Tec. Co., Ltd.) in a 300 mL quartz glass reaction cell containing 25 mg of photocatalyst, 90 mL of H<sub>2</sub>O and 10 mL of TEOA, in which TEOA was used as a sacrificial reagent. To achieve uniform suspension, the mixture solution was sonicated for 10 min prior to reaction. Then, a 300 W Xe lamp (PLS-SXE300/300UV, Beijing PerfectLight Tec. Co., Ltd.) with cooling water (stabilize the temperature at 5°C) was served as light source to trigger the photocatalytic reaction and the suspension was continuously stirred to ensure uniform irradiation. H<sub>2</sub> gas generation was analyzed using an online gas chromatograph (GC-2014C, Shimadzu Co., Japan, with Ar as the carrier gas) equipped with an MS-5A column and a thermal conductivity detector (TCD). When visible light is utilized for photocatalytic H<sub>2</sub> generation experiments, a 420 nm cut-off filter was positioned in front of the lamp's lens, and the actual light power density was measured to be 654 W/m<sup>2</sup>. For stability tests, nine cycles of 36 h were conducted, following the same procedure as described above for photocatalytic H<sub>2</sub> generation experiments. After every cycle was done, the system needs to be fully degassed until vacuumed. The apparent quantum efficiency (AQE) was measured at four

wavelengths (420 nm, 450 nm, 475 nm, and 500 nm) of monochromatic light, and calculated according to the following formula:

$$AQE = \frac{2N1}{N2} \times 100\%$$

where N1 and N2 represent the number of evolved H<sub>2</sub> molecules and the incident photons, respectively.

### 5 1.6. (Photo)electrochemical measurements

Typically, the (photo)electrochemical measurements were performed with a three-electrode system on an electrochemical workstation. The sample film on FTO, Pt wire and Ag/AgCl (saturated KCl) were served as the working electrode, counter electrode and reference electrode, respectively. To prepare of sample film, 10 mg of catalysts were thoroughly mixed with 375 μL of deionized water, 10 125 μL of ethanol and 50 μL of Nafion solution to get a slurry. Afterwards, 30 μL of slurry was evenly dropped onto the FTO substrate and calcined for 30 min at 250°C in an Ar atmosphere. For all the (photo)electrochemical measurements, 0.5 M Na<sub>2</sub>SO<sub>3</sub> aqueous solution was used as the electrolyte. For photoelectrochemical (PEC) tests, the simulated solar light was supported by a 300 W Xe lamp equipped with an AM 1.5G optical filter. Electrochemical impedance spectroscopy (EIS) was 15 conducted under light irradiation at potential of 0 V vs. Ag/AgCl over the frequency range from 100 kHz to 0.01 Hz with an amplitude of 5 mV. Open circuit potential (OCP) decay curves were performed after turning off the light irradiation, which were employed to analyze the charge decay behaviors. Current-time (*i-t*) curves were conducted with a light on/off cycle for every 40 s. Mott-Schottky (M-S) plots were tested under a frequency of 1000 Hz in dark condition.

### *1.7. SPV and TPV measurements*

The lock-in-based surface photovoltage (SPV) spectrum was performed in a photovoltaic cell with a fluorine-doped tin oxide (FTO)-sample-FTO device under a 500 W Xe lamp (CHF-XM-500 W, Global Xenon Lamp Power) with a grating monochromator (Omni-5007, Zolix), a lock-in amplifier 5 (SR830-D SP) and a light chopper (SR540). Transient photovoltage (TPV) measurements were conducted under a laser radiation pulse with the wavelength of 355 nm and pulse width of 5 ns from a third-harmonic Nd:YAG laser (Polaris II, New Wave128 Research, Inc.). The intensity of the pulse was read by a Joule meter (Starlite, Ophir, Inc.).

## 2. Supplemental Figures and Tables

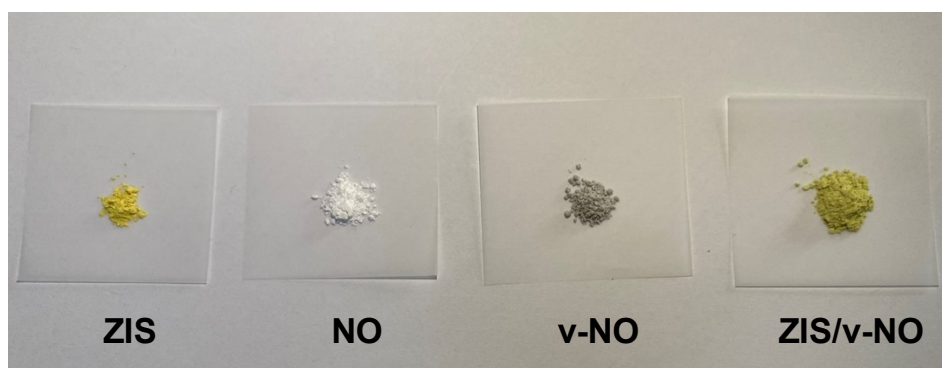

**Fig. S1.** Physical photographs of ZIS, NO, v-NO, and ZIS/v-NO catalysts.

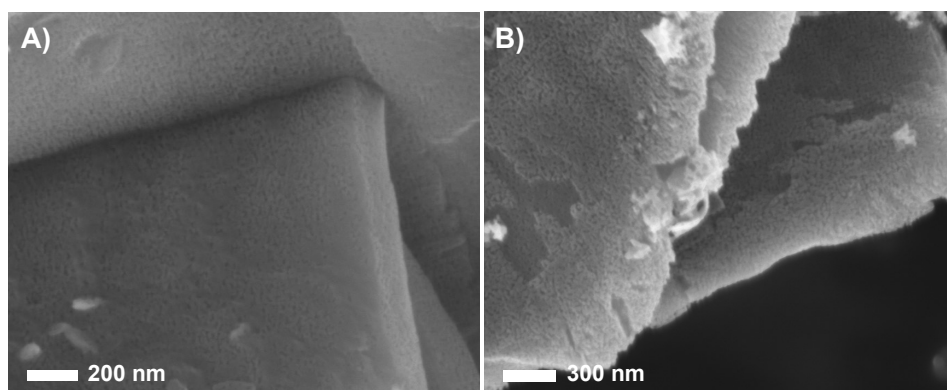

5

**Fig. S2.** FIB-SEM images of (A) NO and (B) v-NO.

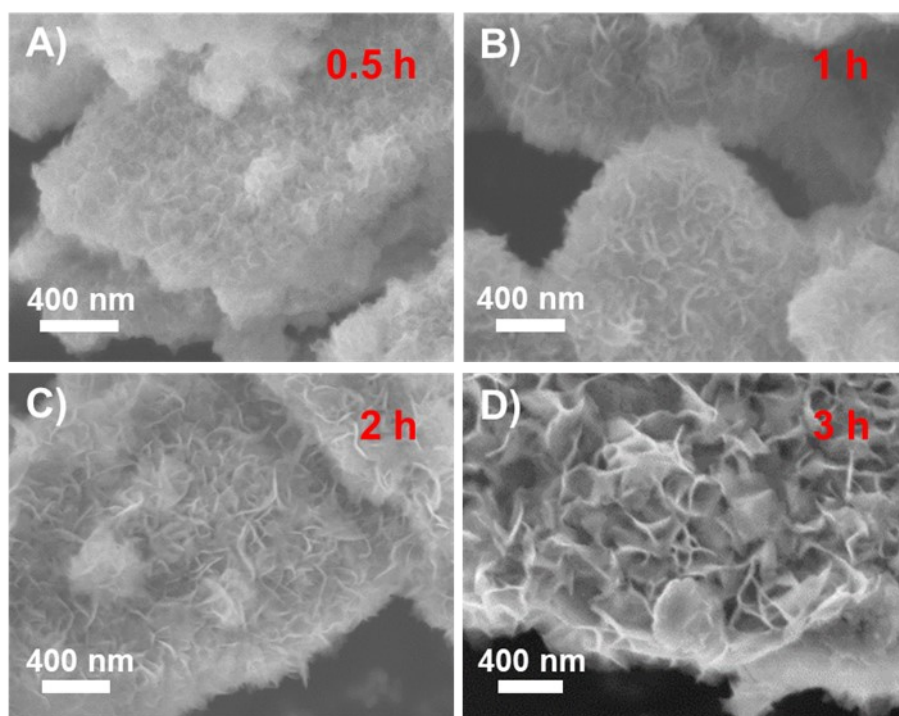

**Fig. S3.** FIB-SEM images of ZIS/v-NO composites synthesized at 80°C with different reaction time, (A) 0.5 h, (B) 1 h, (C) 2 h, and (D) 3 h.

As shown in Fig. S3, it can be clearly seen that ZIS nanosheets are uniformly dispersed and grown  
5 in situ on the surface of v-NO nanoplates to prepare ZIS/v-NO composites. During the hydrothermal  
progress, the morphology of prepared ZIS nanosheets becomes more distinct and their transverse size  
gradually increase with the increasing reaction time. Therefore, the reaction time influences the extent  
of ZIS growth and determines the thickness of ZIS/v-NO.



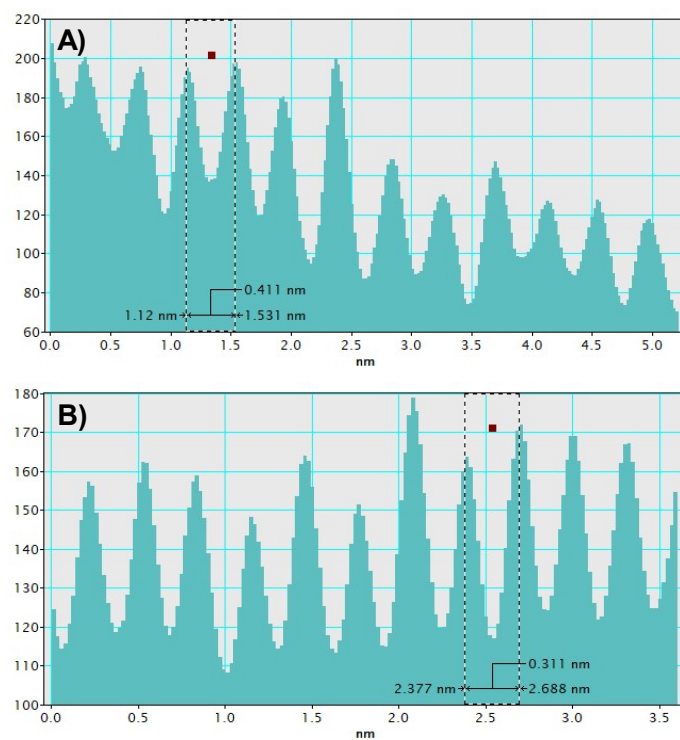

**Fig. S4.** HRTEM based line-intensity profiles of crystal fringes of (A) ZIS (006) plane and (B) NO (100) plane.

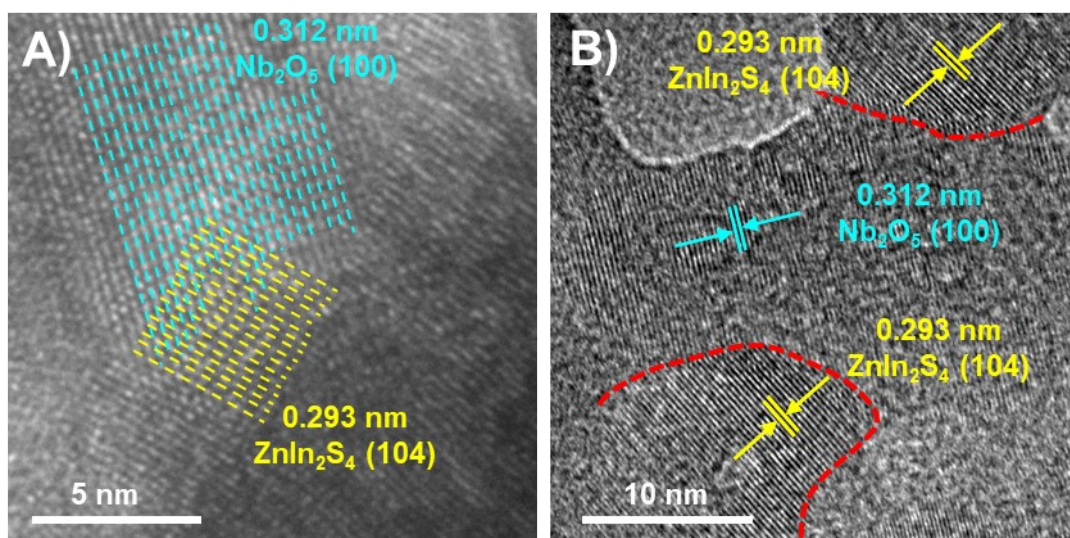

**Fig. S5** HRTEM images of ZIS/v-NO.

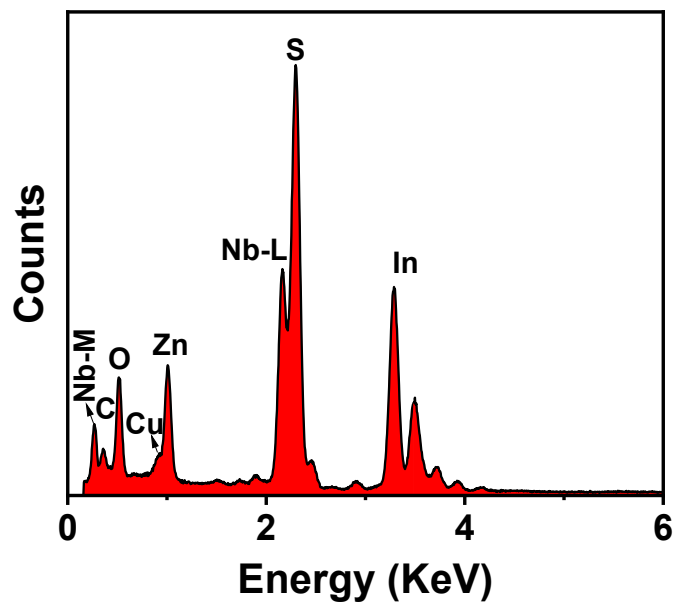

Fig. S6. EDX spectrum of ZIS/v-NO.

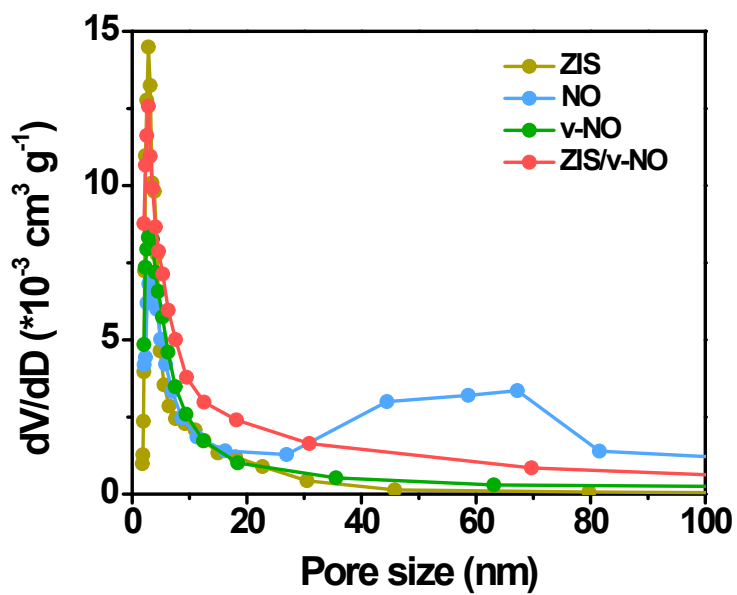

Fig. S7. Pore size distributions of ZIS, NO, v-NO, and ZIS/v-NO.

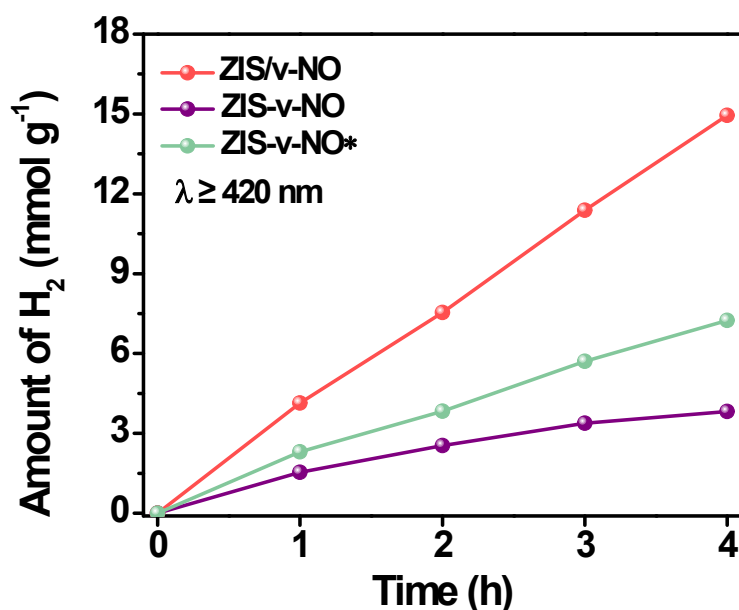

**Fig. S8.** Time-dependent photocatalytic H<sub>2</sub> evolution performance of ZIS/v-NO obtained from different preparation methods under visible light irradiation ( $\lambda \geq 420$  nm).

To investigate the impact of the strong interaction formed in the ZIS/v-NO heterojunction on photocatalytic activity, we performed experiments to evaluate the performance of composites prepared using different methods. Here, a ZIS-v-NO composite was prepared by vigorously stirring a mixture of ZIS and v-NO in an ethanol solution, followed by drying. The sample denoted as ZIS-v-NO\* was obtained by grinding the powders of ZIS and v-NO in a mortar. As displayed in Fig. S8, both ZIS-v-NO and ZIS-v-NO\* exhibit significantly lower H<sub>2</sub>-evolution activity and substantial decay in photocatalytic performance compared to that of ZIS/v-NO. These results demonstrate that the strong interfacial interaction within the ZIS/v-NO heterojunction can effectively enhance rapid separation and transfer of photogenerated charge carriers, thereby greatly improving photocatalytic efficiency.

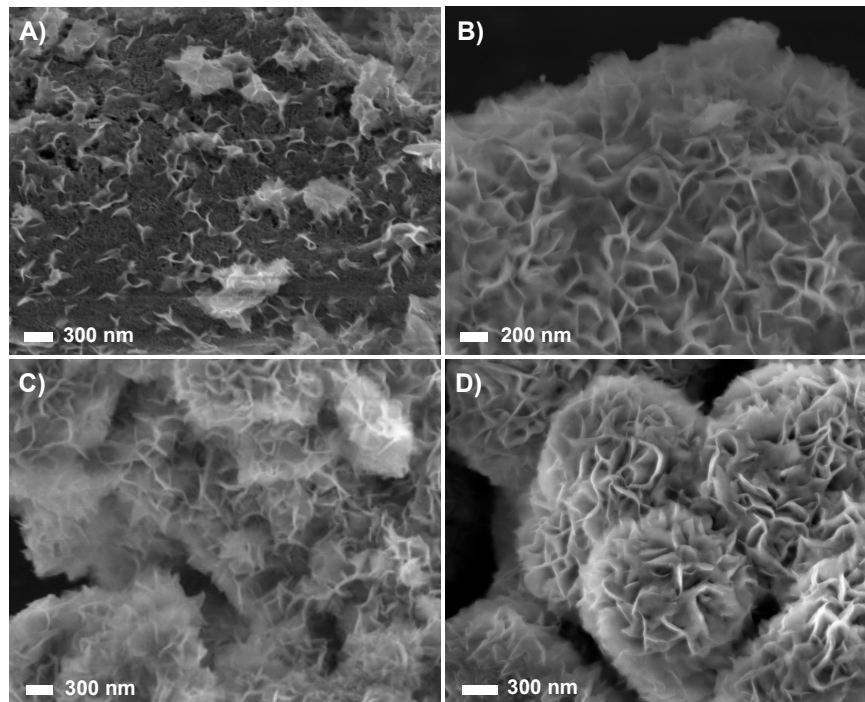

**Fig. S9.** FIB-SEM images of (A) ZIS/v-NO-90, (B) ZIS/v-NO-30, (C) ZIS/v-NO-10, and (D) ZIS.

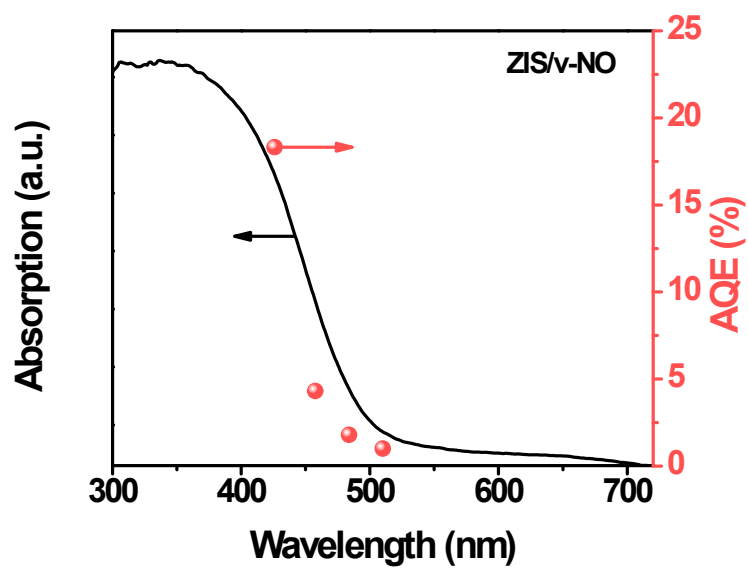

**Fig. S10.** UV-vis DRS (black line) and wavelength-dependent AQE (red symbols) of photocatalytic H<sub>2</sub> evolution over ZIS/v-NO.

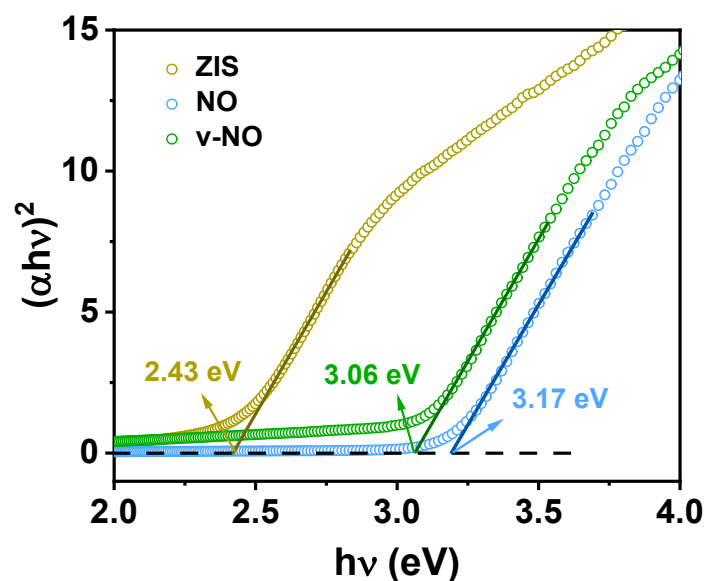

Fig. S11. The  $(\alpha h\nu)^2$  versus  $h\nu$  curves of ZIS, NO and v-NO obtained from UV-vis DRS.

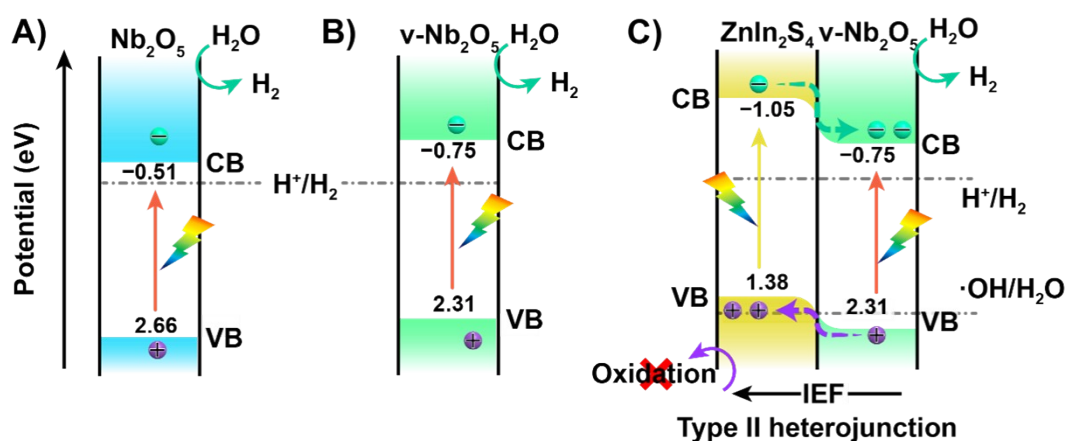

Fig. S12. The energy level diagrams of (A) NO, (B) v-NO, and (C) type II heterojunction of ZIS/v-NO.

5 Fig. S12 shows the energy level diagrams of NO, v-NO, and type II heterojunction of ZIS/v-NO. The negative  $E_{CB}$  of v-NO compared to NO indicates an enhanced reduction ability of photogenerated electrons in water reduction reaction for  $H_2$  generation. If ZIS and v-NO forms the type II heterojunction (Fig. S12C), the CB-electrons of ZIS will flow towards v-NO, and correspondingly VB-holes of v-NO transfers towards ZIS. As a result, the reduction and oxidation reactions will occur 10 at v-NO and ZIS, respectively.

### 3. Supplementary Tables

**Table S1.** Element contents of ZIS/v-NO obtained from EDX spectrum.

| Element             | Zn    | In    | S     | Nb    | O     |
|---------------------|-------|-------|-------|-------|-------|
| Mass fraction (%)   | 10.63 | 36.35 | 22.30 | 26.46 | 4.26  |
| Atomic fraction (%) | 9.61  | 19.29 | 39.63 | 17.37 | 14.11 |

**Table S2.** Energy band structures of ZIS, NO and v-NO.

| Sample | $E_g$ (eV) | $E_{CB}$ (V vs. NHE) | $E_{VB}$ (V vs. NHE) |
|--------|------------|----------------------|----------------------|
| ZIS    | 2.43       | -1.05                | 1.38                 |
| NO     | 3.17       | -0.51                | 2.66                 |
| v-NO   | 3.06       | -0.75                | 2.31                 |

5 **Table S3.** Comparison of the photocatalytic H<sub>2</sub>-evolution rate over ZIS and NO-based photocatalysts reported recently.

| Photocatalyst                                                        | Reaction condition                                                                           | H <sub>2</sub> evolution rate (mmol g <sup>-1</sup> h <sup>-1</sup> ) | Cocatalyst       | Ref.      |
|----------------------------------------------------------------------|----------------------------------------------------------------------------------------------|-----------------------------------------------------------------------|------------------|-----------|
| ZnIn <sub>2</sub> S <sub>4</sub> /v-Nb <sub>2</sub> O <sub>5</sub>   | 300 W Xe lamp ( $\geq 420$ nm), 25 mg catalyst, 90 mL H <sub>2</sub> O, 10 mL TEOA           | 3.70                                                                  | -                | This work |
| 8wt%Nb <sub>2</sub> O <sub>4</sub> /ZnIn <sub>2</sub> S <sub>4</sub> | 300 W Xe lamp, 15 mg catalyst, 40 mL H <sub>2</sub> O, 7.5 mL TEOA                           | 1.73                                                                  | -<br>~2.3 wt% Pt | S1        |
| TpBD COF/ZnIn <sub>2</sub> S <sub>4</sub>                            | 300 W Xe lamp ( $\geq 420$ nm), 25 mg catalyst, 50 mL H <sub>2</sub> O, 0.05 M Ascorbic acid | 2.30                                                                  | -                | S2        |
| C <sub>3</sub> N <sub>4</sub> /Nb <sub>2</sub> O <sub>5</sub>        | 300 W Xe lamp ( $> 400$ nm), 50 mg catalyst, 90 mL H <sub>2</sub> O, 10 mL TEOA              | 1.71                                                                  | 1.5 wt% Pt       | S3        |
| g-C <sub>3</sub> N <sub>4</sub> @ZnIn <sub>2</sub> S <sub>4</sub>    | 300 W Xe lamp ( $\geq 420$ nm), 50 mg catalyst, 40 mL H <sub>2</sub> O, 10 mL TEOA           | 2.78                                                                  | -                | S4        |

|                                                                               |                                                                                                                                           |      |          |     |
|-------------------------------------------------------------------------------|-------------------------------------------------------------------------------------------------------------------------------------------|------|----------|-----|
| $\text{Co}_3\text{O}_4@\text{ZnIn}_2\text{S}_4$                               | 300 W Xe lamp (AM 1.5G), 25 mg catalyst, 45 mL $\text{H}_2\text{O}$ , 5 mL TEOA                                                           | 2.24 | -        | S5  |
| $\text{Ag}_2\text{S}-\text{ZnIn}_2\text{S}_4$                                 | 300 W Xe lamp ( $> 420$ nm), 25 mg catalyst, 50 mL $\text{H}_2\text{O}$ , 0.2 M $\text{Na}_2\text{S}-\text{Na}_2\text{SO}_3$              | 1.00 | -        | S6  |
| $\text{ZnIn}_2\text{S}_4@\text{NH}_2\text{-MIL-125(Ti)}$                      | 300 W Xe lamp ( $> 420$ nm), 50 mg catalyst, 100 mL $\text{H}_2\text{O}$ , 0.35 M $\text{Na}_2\text{S} + 0.25$ M $\text{Na}_2\text{SO}_3$ | 2.20 | -        | S7  |
| $\text{Ni}_2\text{P}/\text{ZnIn}_2\text{S}_4$                                 | 300 W Xe lamp ( $> 400$ nm), 50 mg catalyst, 100 mL $\text{H}_2\text{O}$ , 10 mL Lactic acid                                              | 2.06 | -        | S8  |
| $\text{Zn}_3\text{In}_2\text{S}_6/\text{F}-\text{C}_3\text{N}_4$              | 300 W Xe lamp ( $> 420$ nm), 50 mg catalyst, 100 mL $\text{H}_2\text{O}$ , 0.35 M $\text{Na}_2\text{S} + 0.25$ M $\text{Na}_2\text{SO}_3$ | 0.51 | 2 wt% Pt | S9  |
| $\text{COP}-\text{ZnIn}_2\text{S}_4$                                          | 300 W Xe lamp, 50 mg catalyst, 50 mL $\text{H}_2\text{O}$ , 0.35 M $\text{Na}_2\text{S} + 0.25$ M $\text{Na}_2\text{SO}_3$                | 0.95 | -        | S10 |
| $\text{g}-\text{C}_3\text{N}_4@\text{ZnIn}_2\text{S}_4$                       | 300 W Xe lamp with simulated sunlight, 10 mg catalyst, 120 mL methanol solution, ( $v(\text{H}_2\text{O})/v(\text{methanol}) = 90:30$ )   | 4.07 | -        | S11 |
| $\text{ZnIn}_2\text{S}_4/\text{g}-\text{C}_3\text{N}_4/\text{Ti}_3\text{C}_2$ | 300 W Xe lamp ( $> 420$ nm), 10 mg catalyst, 8 mL TEOA, 72 mL $\text{H}_2\text{O}$                                                        | 2.45 | -        | S12 |
| $\text{ZnIn}_2\text{S}_4/\text{g}-\text{C}_3\text{N}_4$                       | 300 W Xe lamp ( $> 420$ nm), 50 mg catalyst, 20 mL TEOA, 80 mL $\text{H}_2\text{O}$                                                       | 3.21 | -        | S13 |
| $\text{Ti}_3\text{C}_2\text{T}_x/\text{ZnIn}_2\text{S}_4$                     | 300 W Xe lamp ( $> 420$ nm), 20 mg catalyst, 4 mL TEOA, 36 mL $\text{H}_2\text{O}$                                                        | 3.47 | 3 wt% Pt | S14 |

## References

- S1 Y. Wang, X. Kong, M. Jiang, F. Zhang and X. Lei, A Z-scheme ZnIn<sub>2</sub>S<sub>4</sub>/Nb<sub>2</sub>O<sub>5</sub> nanocomposite: Constructed and used as an efficient bifunctional photocatalyst for H<sub>2</sub> evolution and oxidation of 5-hydroxymethylfurfural, *Inorg. Chem. Front.*, 2020, **7**, 437-446.
- S2 S. Bao, Q. Tan, S. Wang, J. Guo, K. Lv, S. A. C. Carabineiro and L. Wen, TpBD COF@ZnIn<sub>2</sub>S<sub>4</sub> nanosheets: A novel S-scheme heterojunction with enhanced photoreactivity for hydrogen production, *Appl. Catal., B*, 2023, **330**, 122624.
- S3 Q.-Z. Huang, J.-C. Wang, P.-P. Wang, H.C. Yao and Z.-J. Li, In-situ growth of mesoporous Nb<sub>2</sub>O<sub>5</sub> microspheres on g-C<sub>3</sub>N<sub>4</sub> nanosheets for enhanced photocatalytic H<sub>2</sub> evolution under visible light irradiation, *Int. J. Hydrogen energy*, 2017, **42**, 6683-6694.
- S4 B. Lin, H. Li, H. An, W. Hao, J. Wei, Y. Dai and C. Ma, Preparation of 2D/2D g-C<sub>3</sub>N<sub>4</sub> nanosheet@ZnIn<sub>2</sub>S<sub>4</sub> nanoleaf heterojunctions with well-designed high-speed charge transfer nanochannels towards high-efficiency photocatalytic hydrogen evolution, *Appl. Catal., B*, 2018, **220**, 542-552.
- S5 Y. Shi, L. Li, Z. Xu, F. Guo and W. Shi, Construction of full solar-spectrum available S-scheme heterojunction for boosted photothermal-assisted photocatalytic H<sub>2</sub> production, *Chem. Eng. J.*, 2023, **459**, 141549.
- S6 J. Liu, G. Chen and J. Sun, Ag<sub>2</sub>S-modified ZnIn<sub>2</sub>S<sub>4</sub> nanosheets for photocatalytic H<sub>2</sub> generation, *ACS Appl. Nano Mater.*, 2020, **3**, 11017-11024.
- S7 H. Liu, J. Zhang and D. Ao, Construction of heterostructured ZnIn<sub>2</sub>S<sub>4</sub>@NH<sub>2</sub>-MIL-125(Ti) nanocomposites for visible-light-driven H<sub>2</sub> production, *Appl. Catal., B*, 2018, **221**, 433-442.
- S8 X.-l. Li, X.-j. Wang, J.-y. Zhu, Y.-p. Li, J. Zhao and F.-t. Li, Fabrication of two-dimensional Ni<sub>2</sub>P/ZnIn<sub>2</sub>S<sub>4</sub> heterostructures for enhanced photocatalytic hydrogen evolution, *Chem. Eng. J.*, 2018, **353**, 15-24.
- S9 Y. Wu, H. Wang, W. Tu, Y. Liu, S. Wu, Y. Z. Tan and J. W. Chew, Construction of hierarchical 2D-2D Zn<sub>3</sub>In<sub>2</sub>S<sub>6</sub>/fluorinated polymeric carbon nitride nanosheets photocatalyst for boosting photocatalytic degradation and hydrogen production performance, *Appl. Catal., B*, 2018, **233**, 58-69.



- S10 C. Cui, X. Zhao, X. Su, N. Xi, X. Wang, X. Yu, X. L. Zhang, H. Liu and Y. Sang, Porphyrin-based donor-acceptor covalent organic polymer/ZnIn<sub>2</sub>S<sub>4</sub> Z-scheme heterostructure for efficient photocatalytic hydrogen evolution, *Adv. Funct. Mater.*, 2022, **32**, 2208962.
- S11 Y. Xiao, B. Yao, M. Cao and Y. Wang, Super-photothermal effect-mediated fast reaction kinetic in S-scheme organic/inorganic heterojunction hollow spheres toward optimized photocatalytic performance, *Small*, 2023, **19**, 2207499.
- S12 L. Wang, T. Yang, L. Peng, Q. Zhang, X. She, H. Tang and Q. Liu, Dual transfer channels of photo-carriers in 2D/2D/2D sandwich-like ZnIn<sub>2</sub>S<sub>4</sub>/g-C<sub>3</sub>N<sub>4</sub>/Ti<sub>3</sub>C<sub>2</sub> MXene S-scheme/Schottky heterojunction for boosting photocatalytic H<sub>2</sub> evolution, *Chin. J. Catal.*, 2022, **43**, 2720-2731.
- S13 Y. Qin, H. Li, J. Lu, Y. Feng, F. Meng, C. Ma, Y. Yan and M. Meng, Synergy between van der waals heterojunction and vacancy in ZnIn<sub>2</sub>S<sub>4</sub>/g-C<sub>3</sub>N<sub>4</sub> 2D/2D photocatalysts for enhanced photocatalytic hydrogen evolution, *Appl. Catal., B*, 2020, **277**, 119254.
- S14 G. Zuo, Y. Wang, W. L. Teo, A. Xie, Y. Guo, Y. Dai, W. Zhuo, D. Jana, Q. Xian, W. Dong and Y. Zhao, Ultrathin ZnIn<sub>2</sub>S<sub>4</sub> Nanosheets Anchored on Ti<sub>3</sub>C<sub>2</sub>T<sub>x</sub> MXene for Photocatalytic H<sub>2</sub> Evolution, *Angew. Chem. Int. Ed.*, 2020, **59**, 11287-11292.
